Zamarbide et al

1           **Loss of the intellectual disability and autism gene *Cc2d1a* and its homolog**  
2           ***Cc2d1b* differentially affect spatial memory, anxiety, and hyperactivity**

3

4

5   Marta Zamarbide<sup>1</sup>, Adam W. Oaks<sup>1</sup>, Heather L. Pond<sup>1</sup>, Julia S. Adelman<sup>1</sup>, M. Chiara  
6   Manzini<sup>1,2</sup>

7

8   1 Institute for Neuroscience and Department of Pharmacology and Physiology, The  
9   George Washington University School of Medicine and Health Sciences, Washington,  
10   DC, USA

11   2 Autism and Neurodevelopmental Disorders Institute, The George Washington  
12   University, Washington, DC, USA

13

14

15   Corresponding author:

16   M. Chiara Manzini  
17   The George Washington University  
18   2300 Eye Street NW  
19   Ross Hall 650  
20   Washington, DC 20037  
21   Email: [cmanzini@gwu.edu](mailto:cmanzini@gwu.edu)

22

23

24   Keywords: intellectual disability, learning, social function, anxiety, hyperactivity, rare  
25   diseases, mouse models

26

27

Zamarbide et al

28 **ABSTRACT (250 words)**

29 Hundreds of genes are mutated in non-syndromic intellectual disability (ID) and autism  
30 spectrum disorder (ASD), with each gene often involved in only a handful of cases. Such  
31 heterogeneity can be daunting, but rare recessive loss of function (LOF) mutations can  
32 be a good starting point to provide insight into the mechanisms of neurodevelopmental  
33 disease. Biallelic LOF mutations in the signaling scaffold *CC2D1A* cause a rare form of  
34 autosomal recessive ID, sometimes associated with ASD and seizures. In parallel, we  
35 recently reported that *Cc2d1a*-deficient mice present with cognitive and social deficits,  
36 hyperactivity and anxiety. In *Drosophila* loss of the only ortholog of *Cc2d1a*, *lgd*, is  
37 embryonic lethal, while in vertebrates *Cc2d1a* has a homolog *Cc2d1b* which appears to  
38 be compensating, indicating that *Cc2d1a* and *Cc2d1b* have redundant function in  
39 humans and mice. Here, we generate an allelic series of *Cc2d1a* and *Cc2d1b* loss of  
40 function to determine the relative role of these genes during behavioral development.  
41 We generated *Cc2d1b* knockout (KO), *Cc2d1a/1b* double heterozygous and double KO  
42 mice, then performed behavioral studies to analyze learning and memory, social  
43 interactions, anxiety, and hyperactivity. We found that *Cc2d1a* and *Cc2d1b* have partially  
44 overlapping roles. Overall, loss of *Cc2d1b* is less severe than loss of *Cc2d1a*, only  
45 leading to cognitive deficits, while *Cc2d1a/1b* double heterozygous animals are similar to  
46 *Cc2d1a*-deficient mice. These results will help us better understand the deficits in  
47 individuals with *CC2D1A* mutations, suggesting that recessive *CC2D1B* mutations and  
48 trans-heterozygous *CC2D1A* and *CC2D1B* mutations could also contribute to the  
49 genetics of ID.

50

Zamarbide et al

## 51 INTRODUCTION

52 Autosomal recessive loss of function (LOF) of the signaling scaffold Coiled-coil  
53 and C2 Domain containing 1A (*CC2D1A*) causes a spectrum of neurodevelopmental  
54 conditions including fully penetrant intellectual disability (ID), and variably penetrant  
55 autism spectrum disorder (ASD), seizures, and aggressive behavior (Basel-Vanagaite et  
56 al., 2006; Manzini et al., 2014; Reuter et al., 2017). In *Drosophila*, where only one  
57 CC2D1 homolog, lethal giant discs *lgd*, is present, removal of *lgd* is lethal during the  
58 larval stage (Gallagher and Knoblich, 2006; Jaekel and Klein, 2006). Expression of  
59 either human CC2D1A or CC2D1B can rescue the phenotypes observed in *Drosophila*  
60 (Drusenheimer et al., 2015), suggesting that CC2D1A and CC2D1B act redundantly.  
61 Despite wide expression of CC2D1A and its binding to multiple proteins involved in the  
62 immune response (Chang et al., 2011; Chen et al., 2012), *CC2D1A* LOF in humans  
63 appears to only affect the brain, leading to a spectrum of behavioral deficits. While this  
64 indicates that CC2D1B is not fully able to compensate in the brain leading to the human  
65 presentation, it is unclear whether CC2D1B itself could have a role in  
66 neurodevelopmental disorders.

67 Studies on the genetic causes of ID and ASD, in particular, are identifying a large  
68 contribution of *de novo* and hypomorphic mutations to these diseases (Lim et al., 2013;  
69 Musante and Ropers, 2014; Sanders et al., 2012; Yu et al., 2013). Many of the mutated  
70 genes would have greater impact on development if completely lost, leading to multi-  
71 system disorders and/or brain malformations, while the heterozygous and hypomorphic  
72 mutations found in ASD/ID affect neurons more mildly, leading to a grossly normal brain,  
73 but with cognitive and social deficits (Yu et al., 2013). We wondered whether a similar  
74 mechanism is at play in patients with *CC2D1A* LOF mutations, where CC2D1B can only  
75 partially compensate. If this was the case, removal of both CC2D1 genes would be

Zamarbide et al

76 incompatible with embryogenesis, indicating that these proteins together have a critical  
77 developmental role. Nothing is known about the role of *CC2D1B* in brain development.  
78 By comparing how individual loss of each gene affects cognitive, social, and affective  
79 function we have studied the relative role of *CC2D1A* and *CC2D1B* in the brain and  
80 defined whether *CC2D1B* should also be considered as a candidate gene for ID.

81 Mice deficient for *Cc2d1a* develop normally *in utero*, but die soon after birth  
82 because of breathing and swallowing deficits (Al-Tawashi et al., 2012; Oaks et al., 2017;  
83 Zhao et al., 2011). By conditionally removing *Cc2d1a* in the forebrain we have previously  
84 shown that *Cc2d1a* LOF recapitulates features of ID and ASD in adult animals (Oaks et  
85 al., 2017). *Cc2d1a* conditional knockout (1a-cKO) mice show learning and memory  
86 deficits, social deficits, hyperactivity, anxiety, and repetitive behaviors (Oaks et al.,  
87 2017).

88 To define how *CC2D1B* compensates for loss of *CC2D1A* and contributes to  
89 these phenotypes, we generated a *Cc2d1b* knockout (1b-KO) line and developed an  
90 allelic series of *Cc2d1a* and *Cc2d1b* LOF, including *Cc2d1a/1b* double heterozygote  
91 (1a/1b-dHET) and double KO (1a/1b-KO) animals. Removal of both *CC2D1* proteins  
92 causes early embryonic lethality, showing that *CC2D1* function has an essential  
93 developmental role as in *Drosophila*. 1b-KO and 1a/1b-dHET animals are viable and  
94 fertile suggesting that *Cc2d1a* and *Cc2d1b* are not fully redundant, and that *Cc2d1a* has  
95 a critical role in respiration in the mouse.

96 When we tested the behavioral performance of 1b-KOs we found that *Cc2d1b*  
97 LOF caused only cognitive deficits, which are partially overlapping with those observed  
98 in *Cc2d1a* conditional LOF. Since direct comparison with a global *Cc2d1a* KO is not  
99 possible because of postnatal mortality, we also tested 1a/1b-dHETs which showed a  
100 combination of deficits with features of both 1b-KO and 1a-cKO animals, including

Zamarbide et al

101 delayed memory acquisition and retention, as well as increased anxiety and  
102 hyperactivity mostly in males. Our findings indicate that CC2D1 function is critical for  
103 embryonic development and that the CC2D1 proteins regulate multiple behaviors with  
104 some sex-specificity for males. Both CC2D1A and CC2D1B are involved in learning and  
105 memory, while CC2D1A alone appears to contribute to anxiety and hyperactivity.  
106

Zamarbide et al

## 107 **MATERIALS AND METHODS**

### 108 **Animals**

109 This study was carried out in accordance with the recommendations of the Institutional  
110 Animal Care and Use Committee of The George Washington University. A *Cc2d1b* null  
111 mouse line (1b-KO) was generated by the Knockout Mouse Project Repository (Project  
112 ID CDS 34981) at the University of California Davis, with the allele *Cc2d1b*<sup>tm1a(KOMP)Wtsi</sup>.  
113 *Cc2d1b* null mice carry an *engrailed 2* splice acceptor (En2SA) gene-trap allele with  
114 bicistronic expression of  $\beta$ -galactosidase as well as a neomycin resistance cassette,  
115 flanked by FRT (flippase recombinase target) recombination sites, in the genomic region  
116 between exons 2 and 3 of *Cc2d1b* (**Fig. 1A**). *Cc2d1a/1b* double heterozygous (1a/1b-  
117 dHET) mice were generated by crossing *Cc2d1a* heterozygotes (1a-HET) with *Cc2d1b*  
118 heterozygotes (1b-HET). 1a-HET mice were bred from a *Cc2d1a* null mouse line (KO)  
119 generated by the Knockout Mouse Project Repository (Project Design ID 49663) at the  
120 University of California as was previously described by Oaks et al (Oaks et al., 2017). All  
121 lines are maintained on a C57BL/6 background. For genotyping, polymerase chain  
122 reaction (PCR) amplifications were performed on 1 $\mu$ L of proteinase K (New England  
123 Biolabs, Ipswich MA) digested tail DNA samples. PCR reactions (50 $\mu$ L) consisted of  
124 GoTaq Flexi buffer (Promega, Madison WI), 100 $\mu$ M dNTPs, 50 $\mu$ M each of forward and  
125 reverse primers (sequence available upon request), 1mM MgCl<sub>2</sub>, and 1.25 U GoTaq  
126 Flexi DNA polymerase (Promega, Madison WI), and were run with optimized reaction  
127 profiles determined for each genotype. A 25 $\mu$ L aliquot from each reaction was analyzed  
128 by gel electrophoresis on a 1.0% agarose gel for the presence of the desired band.

### 129 **Histological preparation and microscopy**

130 To prepare tissue for histological analysis, deeply anesthetized mice were transcardially  
131 perfused with phosphate buffered saline (PBS) followed by 4% paraformaldehyde (PFA).

Zamarbide et al

132 Brains were removed and postfixed in PFA. Cryosections from adult mouse brains were  
133 prepared by mounting in Neg-50 (Thermo Scientific, Waltham MA) and cut at 40 $\mu$ m on a  
134 Cryostar NX50 cryostat (Thermo Scientific, Waltham MA), then stained with Hematoxylin  
135 and Eosin (H&E, VWR International, Radnor PA) to visualize tissue architecture.  
136 Imaging of H&E stained sections was performed on a Leica M165 FC stereo microscope  
137 (Leica Microsystems, Buffalo Grove IL).

### 138 **Behavioral tests**

139 A standardized battery of behavioral testing was applied to each cohort of animals, 1b-  
140 KO and 1a/1b-dHET male and female mice, at 3-4 months of age. As both 1b-KOs and  
141 1a/1b-dHETs were generated from the same 1a/1b-dHET breeding the wild-type (WT)  
142 controls were littermates shared by both cohorts and all behavioral tests were performed  
143 at the same time for WT, 1b-KOs and 1a/1b-dHETs. Behavioral tests were performed in  
144 the Manzini lab behavioral suite in the George Washington University Animal Research  
145 Facility following a 60 min period of acclimatization. Initial characterization to analyze  
146 any neurological abnormalities included analysis of basic motor and somatosensory  
147 function was performed on a subset of the behavioral cohort as described by Rogers  
148 (Rogers et al., 1997): righting reflex, wire hang, gait analysis, tail pinch and visual reach.  
149 Cognitive and social function and other behaviors were tested in the open field test,  
150 novel object recognition test (Bevins and Besheer, 2006), Morris water maze (Vorhees  
151 and Williams, 2006), and 3-chamber social interaction test (Nadler et al., 2004).  
152 Behavioral analysis was performed via automated animal tracking using ANY-maze  
153 (Stoelting, Wood Dale IL).

#### 154 *Righting reflex*

155 Coordination, motor strength and vestibular function were tested by placing each mouse  
156 on its back and timing its ability to return to an upright position.

Zamarbide et al

157 *Wire hang*

158 Motor strength was tested by timing the latency to fall to a mouse cage containing  
159 bedding while the mouse was hanging from a wire cage-top not higher than 18 cm.

160 *Gait analysis*

161 Motor coordination and strength were assessed by painting the paws of each mouse  
162 with red non-toxic tempera paint and making them walk through a narrow tunnel over  
163 white paper. Abnormalities of paw placement and stride length were noted or indicated  
164 as normal.

165 *Tail pinch*

166 The ability of each mouse to respond to mild pain was tested by pinching the tip of the  
167 tail with fine, ethanol-cleaned forceps. Reactions were categorized as either response or  
168 no response.

169 *Visual reach*

170 Vision was tested by measuring the latency to the first attempt to reach for a nearby wire  
171 cage-top while the mouse was being held by the base of the tail at a height of 18 cm  
172 over an open cage.

173 *Open field test*

174 The open field test was performed in an unfamiliar 50x50 cm plastic box (Stoelting,  
175 Wood Dale IL). Animals were placed in the center of the arena and ambulatory activity  
176 was monitored by digital video for 15 min. The arena was divided into two areas, an  
177 outer zone and a center zone (25x25 cm; 25% of total area). Total distance traveled and  
178 time spent in each area were measured.

179 *Novel object recognition test*

180 The novel object recognition test (Bevins and Besheer, 2006; Oaks et al., 2017) was  
181 performed in the same apparatus described for the open field test. The test consisted of



Zamarbide et al

182 three different phases: habituation, training and test. The habituation phase lasted for 30  
183 min while the animals were exposed to the box and then returned to the home cage  
184 while the box was cleaned. During the training phase, the animal was placed in the  
185 same box with two identical objects located in opposite corners, at a distance of five cm  
186 from the walls. To assess short-term memory, the animal was returned to the home cage  
187 during an interval of 15 min. During the test, a familiar object, identical to those used in  
188 the habituation phase, was placed in one corner, while in the opposite corner an  
189 unfamiliar object was placed. Exploration activity was monitored for 10 min at each  
190 phase, with exploration defined as time spent actively observing or touching the object  
191 from within a radius of five cm. Cumulative time spent with each object was measured by  
192 video analysis using ANY-maze to determine the location of the animal's nose relative to  
193 the objects in the enclosure. Preference for the novel object was defined as the ratio of  
194 the time spent with the novel object to the time spent with the familiar object. Animals  
195 that did not interact with the object and stopped in a corner of the cage were removed  
196 from the analysis.

#### 197 *Morris water maze*

198 The Morris water maze (Oaks et al., 2017; Vorhees and Williams, 2006) apparatus was  
199 a 120x120cm round metal tub (Stoelting, Wood Dale IL) where distinct visual cues were  
200 placed at the cardinal points. White non-toxic paint was added to the water to make the  
201 surface opaque for the hidden trials and it was maintained at 24 °C. Each trial consisted  
202 of four independent drops, one at each cardinal point around the tub, with the mouse  
203 facing the wall of the tub. Each drop lasted 60s, or until the mouse found the platform,  
204 whichever occurred first. Each animal completed two trials (four drops each) with a  
205 visible platform, five trials with a platform hidden under the water surface, and two  
206 reversal trials where the location of the hidden platform was changed. The sequence of

Zamarbide et al

207 nine trials was performed over nine days, with one trial per day. A 60 s probe trial was  
208 also performed the day after the hidden platform series was completed, by removing the  
209 platform from the water before proceeding to the reversal phase on the following day.

210 *Three-chamber social interaction test*

211 The social interaction test (Kaidanovich-Beilin et al., 2011; Nadler et al., 2004) was  
212 performed in a clear rectangular acrylic box (60x40 cm) divided into three chambers  
213 (40x20 cm) with small openings (10x5 cm) in the adjoining walls (Everything Plastic,  
214 Philadelphia PA). The test consisted of two phases, the habituation and the sociability  
215 phase. During the habituation phase, empty inverted wire cups (10 cm diameter) were  
216 placed in the center of the chambers at the ends. Each mouse was placed in the center  
217 chamber of the apparatus and allowed to explore the different chambers for 5 min.  
218 During the second phase, an unfamiliar mouse of the same sex as the tested mouse  
219 was placed under the wire cup in one of the side chambers. The experimental mice were  
220 allowed to explore for 10 min during the sociability phase. Total time spent in the Object  
221 (containing empty cup) and Mouse (with unfamiliar mouse under the cup) chambers was  
222 used to determine the social preference of each mouse tested, while the time sniffing  
223 within a 2-cm radius of the mouse-containing cup were recorded as measures of social  
224 approach and social interaction.

225

Zamarbide et al

## 226 RESULTS

### 227 CC2D1A and CC2D1B have partially redundant function in development

228 Loss of *CC2D1A* in humans causes a variable spectrum of ID, ASD and seizures  
229 and removal of *Cc2d1a* in the murine forebrain leads to several cognitive, social, and  
230 affective behavioral phenotypes (Manzini et al., 2014; Oaks et al., 2017). As no human  
231 mutations in *CC2D1B* have been identified to date, we asked whether loss of *Cc2d1b* in  
232 the mouse would lead to similar phenotypes as loss of *Cc2d1a*. A *Cc2d1b*-deficient line  
233 (1b-KO) had been generated from the Knockout Mouse Project (KOMP) as a gene-trap  
234 allele inserted in intron 2 of *Cc2d1b* (**Fig. 1A**). We obtained heterozygous animals and  
235 bred them to homozygosity, finding that 1b-KO mice are born in Mendelian ratios (**Fig.**  
236 **1B**). Differently from *Cc2d1a* KO (1a-KO) pups, which die shortly after birth (Al-Tawashi  
237 et al., 2012; Drusenheimer et al., 2015; Oaks et al., 2017; Zhao et al., 2011), 1b-KO  
238 mice are viable, fertile, and are indistinguishable from WT littermates (**Fig. 1C**). Basic  
239 behavioral functions were tested in adult WT and 1b-KO males and females:  
240 coordination (righting reflex), strength (wire hang), locomotion (stride and gait), pain  
241 sensitivity (tail pinch), and vision (visual reflex). No differences were observed in basic  
242 sensory and motor function (**Table 1**). We confirmed via Western blot analysis of cortical  
243 protein lysates that CC2D1B was completely absent in these animals and that CC2D1A  
244 was expressed at normal levels (**Fig. 1D**). Cryosections generated from the adult brain  
245 of 1b-KO animals and stained using hematoxylin and eosin (H&E) showed no  
246 differences in brain size and organization from WT littermates (**Fig. 1E**). In summary,  
247 loss of *Cc2d1b* does not affect respiratory function and deglutition in the infant as  
248 observed in 1a-KOs, and 1b-KO adult mice are indistinguishable from WT littermates.

249 CC2D1A and CC2D1B contain very similar protein domains and are thought to  
250 have redundant functions in endocytic traffic and gene transcription (Drusenheimer et

Zamarbide et al

251 al., 2015; Hadjighassem et al., 2009; Usami et al., 2012). Because CC2D1B loss of  
252 function did not result in postnatal lethality, we wondered whether the two proteins would  
253 only be partially redundant. To test this hypothesis, we crossed 1b-KOs and 1a-KOs to  
254 generate *Cc2d1a/Cc2d1b* double heterozygous (1a/1b-dHET) and double KO mice  
255 (1a/1b-KO). As 1aKO pups die soon after birth (Al-Tawashi et al., 2012; Oaks et al.,  
256 2017; Zhao et al., 2011), we did not expect 1a/1b-KO animals to survive and we  
257 genotyped litters at postnatal day (P)0, collecting tissue from both live and dead pups.  
258 However, while dead 1a-KO and 1a-KO/1b-HET were found in the expected ratios,  
259 1a/1b-dKO pups were never retrieved (**Fig. 2A**), suggesting that double knockouts may  
260 die earlier during embryonic development. Examination of prenatal litters only identified  
261 1a/1b-dKO tissue mid-gestation at E11.5, but the embryo was almost entirely absent,  
262 leaving only a hypomorphic and largely empty yolk sac (**Fig. 2B**). These results indicate  
263 that removal of both CC2D1 proteins leads to early embryonic lethality.

264 1a/1b-dHETs were viable and fertile and indistinguishable from WT littermates  
265 with normal gross brain anatomy (**Fig. 2C**), and normal basic motor and sensory function  
266 (**Table 1**). We tested the expression levels of CC2D1A and CC2D1B in 1a/1b-dHET  
267 mice and found that as expected only a half dose of each CC2D1 protein was present  
268 (**Fig. 2D**). Thus, combined CC2D1 function is necessary for embryonic morphogenesis,  
269 but 1b-KO or 1a/1b-dHET animals develop normally, indicating that CC2D1A and  
270 CC2D1B have similar functions as it pertains to gross anatomical development and  
271 survival.

272

### 273 **Both CC2D1A and CC2D1B are important for cognitive function**

274 We have previously found that loss of *Cc2d1a* leads to a constellation of  
275 behavioral deficits: cognitive and social impairment, anxiety, hyperactivity and repetitive

Zamarbide et al

276 behaviors (Oaks et al., 2017). We generated a cohort of 1b-KO and 1a/1b-HET male  
277 and female mice for behavioral analysis by crossing 1a/1b-HETs, so that we could  
278 compare behavioral performance in both lines at the same time. In the short-term  
279 memory version of the Novel Object Recognition Test (NORT) (Bevins and Besheer,  
280 2006) mice are placed in an arena with two identical objects that they are free to explore.  
281 After being removed back to their cages for 15 minutes, they are put in the arena where  
282 one of the now known objects has been substituted for a novel object (**Fig.3A**). In this  
283 test, WT male and female mice spend roughly four times longer exploring the novel  
284 object, while 1b-KOs and 1a/1b-dHETs show no difference (**Fig.3B-C**) (Males: WT,  
285  $T2/T1=1.21\pm0.32$ ,  $T4/T3=3.90\pm0.75$ ,  $n=10$ ,  $p=0.004$  \*\*; 1b-KO,  $T2/T1=1.05\pm0.24$ ,  
286  $T4/T3=1.60\pm0.46$ ,  $n=11$ ,  $p=0.309$ ; 1a/1b-dHET,  $T2/T1=1.08\pm0.23$ ,  $T4/T3=1.62\pm0.46$ ,  
287  $n=12$ ,  $p=0.307$ . Females: WT,  $T2/T1=1.20\pm0.25$ ,  $T4/T3=4.39\pm1.40$ ,  $n=10$ ,  $p=0.038$  \*; 1b-  
288 KO,  $T2/T1=0.84\pm0.16$ ,  $T4/T3=0.93\pm0.24$ ,  $n=10$ ,  $p=0.757$ ; 1a/1b-dHET,  $T2/T1=1.34\pm0.48$ ,  
289  $T4/T3=1.46\pm0.28$ ,  $n=10$ ,  $p=0.824$ ). This deficit was not due to reduced interest in the  
290 objects, as animals spent similar amounts of time in exploratory behaviors, with 1a/1b-  
291 dHET males showing significantly more exploration (**Fig.3D**. T1+T2 - Males: WT,  
292  $t=26.97\pm5.75s$ ,  $n=10$ ; 1b-KO,  $t=23.17\pm3.65s$ ,  $n=11$ ,  $p=0.999$ ; 1a/1b-dHET,  
293  $t=65.27\pm15.93s$ ,  $n=12$ ,  $p=0.167$ ; Females: WT,  $t=40.56\pm5.19s$ ,  $n=10$ ; 1b-KO,  
294  $t=71.67\pm17.47s$ ,  $n=10$ ,  $p=0.423$ ; 1a/1b-dHET,  $t=54.30\pm10.56s$ ,  $n=10$ ,  $p=0.960$ . **Fig.3E**.  
295 T3+T4 - Males: WT,  $t=21.93\pm5.54s$ ; 1b-KO,  $t=17.91\pm3.57s$ ,  $p=0.999$ ; 1a/1b-dHET,  
296  $t=50.83\pm16.0s$ ,  $p=0.640$ . Females: WT,  $t=15.39\pm2.12s$ ; 1b-KO,  $t=68.38\pm26.04s$ ,  
297  $p=0.090$ ; 1a/1b-dHET,  $t=31.86\pm10.61s$ ,  $p=0.959$ . **Fig.3F**. SUM T1,2,3,4 - Males: WT,  
298  $t=48.90\pm9.35s$ ; 1b-KO,  $t=41.08\pm6.20s$ ,  $p=0.942$ ; 1a/1b-dHET,  $t=116.1\pm28.24s$ ,  $p=0.033$

Zamarbide et al

299 \*; Females: WT,  $t=55.95\pm 6.62s$ , 1b-KO;  $t=140.1\pm 42.64s$ ,  $p=0.073$ ; 1a/1b-dHET,  
300  $t=86.16\pm 20.52s$ ,  $p=0.660$ ).

301 To further assess cognitive function, the 1b-KO mice were tested using the  
302 Morris Water Maze (MWM) paradigm which probes spatial memory acquisition, retention  
303 and flexibility, by testing the ability of a mouse to learn, remember, and relearn the  
304 location of a platform hidden under opaque water (Morris, 1984). After the mice are  
305 trained using a visible platform to escape from the water, the platform is hidden under  
306 the surface in a different location and the animals undergo training on five consecutive  
307 days to learn the location of the platform. On the following day, memory retention is  
308 tested by removing the platform and measuring the amount of time the mouse spends in  
309 the area where the platform was previously located (probe trial). Finally, the position of  
310 the platform is changed and the animal must display flexibility by learning a new location  
311 (reversal). 1a-cKO animals show a delay in initial acquisition of the location of the hidden  
312 platform (HP), but after they learn, they can retain the memory in the probe trial, and  
313 learn a new location in the reversal (Oaks et al., 2017). Both 1b-KO and 1a/1b-dHET  
314 males and females presented deficits in this test (**Fig.4**). 1b-KO males and females and  
315 1a/1b-dHET males were delayed in the hidden platform acquisition showing significant  
316 differences in day 2 or 3 of the test (HP2 and HP3 in **Fig.4B** and **F**) (Males HP3: WT,  
317  $t=6.82\pm 0.69s$ ,  $n=11$ ; 1b-KO,  $t=10.97\pm 1.85s$ ,  $n=10$ ,  $p=0.042$  \*; 1a/1b-dHET,  
318  $t=11.99\pm 1.28s$ ,  $n=13$ ,  $p=0.0027$  \*\*. Females HP2: WT,  $t=12.30\pm 1.32s$ ,  $n=13$ ; 1b-KO,  
319  $t=19.62\pm 1.74s$ ,  $n=10$ ,  $p=0.0025$  \*\*; 1a/1b-dHET,  $t=14.66\pm 1.64s$ ,  $n=11$ ,  $p=0.247$ ).

320 1a/1bHET males and females were also affected in the probe trial where they spent less  
321 time in the platform quadrant during the first 15sec of the 60sec trial (**Fig.4D** and **H**)  
322 (Probe 15s - Males: WT,  $t=9.51\pm 0.83s$ ,  $n=11$ ; 1b-KO,  $t=6.13\pm 0.50s$ ,  $n=10$ ,  $p=0.0029$  \*\*;

Zamarbide et al

323 1a/1b-dHET,  $t=5.48\pm0.80s$ ,  $n=13$ ,  $p=0.0021$  \*\*. Females: WT,  $t=7.18\pm0.80s$ ,  $n=13$ ; 1b-  
324 KO,  $t=5.77\pm0.65s$ ,  $n=10$ ,  $p=0.203$ ; 1a/1b-dHET,  $t=4.36\pm0.82s$ ,  $n=11$ ,  $p=0.022$  \*). Finally,  
325 1b-KO males, but not females, were affected throughout the 60sec probe trial and spent  
326 less time exploring the correct quadrant in the probe trial testing memory retention  
327 (**Fig.4D**) (Probe 60s - Males: WT,  $t=25.40\pm1.78s$ ,  $n=11$ ; 1b-KO,  $t=19.58\pm1.30s$ ,  $n=10$   
328  $p=0.018$  \*; 1a/1b-dHET,  $t=22.74\pm2.63s$ ,  $n=13$ ,  $p=0.428$ . Females: WT,  $t=21.19\pm1.85s$ ,  
329  $n=13$ ; 1b-KO,  $t=20.57\pm1.54s$ ,  $n=10$ ,  $p=0.809$ ; 1a/1b-dHET,  $t=18.43\pm2.62s$ ,  $n=11$ ,  
330  $p=0.389$ ). Animals heterozygous for loss of *Cc2d1a* or *Cc2d1b* alone showed normal  
331 behavioral performance (**Suppl. Table 1** and **Fig. 1-2**). In summary, loss of CC2D1B  
332 lead to cognitive deficits in both memory acquisition and retention. In general, males  
333 appear more severely affected than females in both 1bKO and 1a/1bHET lines,  
334 suggesting that CC2D1A and CC2D1B have overlapping roles in cognitive function.

335

### 336 **Only CC2D1A is involved in anxiety and hyperactivity**

337 1A-cKO animals showed increased mobility and reduced entry into the center of  
338 the open field arena, indicating hyperactivity and anxiety (Oaks et al., 2017). In addition,  
339 removal of *Cc2d1a* in the forebrain also leads to ulcerative dermatitis due to obsessive  
340 grooming and social interaction deficits (Oaks et al., 2017). 1b-KO males and females  
341 performed similarly to WT littermates in the open field test and showed no signs of  
342 hyperactivity or anxiety (**Fig. 5**) (Distance - Males: WT,  $d=25.16\pm2.29m$ ,  $n=11$ ; 1b-KO,  
343  $d=29.63\pm1.96m$ ,  $n=11$ ,  $p=0.498$ ; Females: WT,  $d=34.65\pm1.36m$ ,  $n=13$ ; 1b-KO,  
344  $d=42.37\pm3.28m$ ,  $n=11$ ,  $p=0.097$ . Time in center - Males: WT,  $t=78.13\pm5.23s$ ,  $n=11$ ; 1b-  
345 KO,  $t=83.17\pm14.26s$ ,  $n=11$ ,  $p=0.988$ ; Females: WT,  $t=77.45\pm11.78s$ ,  $n=10$ ; 1b-KO,  
346  $t=87.75\pm17.65s$ ,  $n=10$ ,  $p=0.969$ ). Interestingly, 1a/1b-dHETs showed increased

Zamarbide et al

347 locomotion and avoidance of open spaces, as previously observed for the 1a-cKOs, but  
348 only in males similarly to the exploration in the NORT where increased exploratory  
349 behavior was only observed in 1a/1b-dHET males (**Fig.5A-B**) (Distance - Males: WT,  
350  $d=25.16\pm 2.29m$ ,  $n=11$ ; 1a/1b-dHET,  $d=35.85\pm 2.94m$ ,  $n=13$ ,  $p=0.0076$  \*\*; Females: WT,  
351  $d=34.65\pm 1.36m$ ,  $n=13$ ; 1a/1b-dHET,  $d=35.35\pm 2.51m$ ,  $n=11$ ,  $p=0.999$ . Time in center -  
352 Males: WT,  $t=78.13\pm 5.23s$ ,  $n=11$ ; 1a/1b-dHET,  $t=41.32\pm 3.71s$ ,  $n=13$ ,  $p=0.0198$  \*;  
353 Females: WT,  $t=77.45\pm 11.78s$ ,  $n=10$ ; 1b-KO,  $t=121.90\pm 15.19s$ ,  $n=11$ ,  $p=0.1225$ ). No  
354 ulcerative dermatitis or obsessive grooming was observed in any of these mouse lines.

355 Finally, all mice were tested in the social approach version of the three-  
356 chambered test. In this test, the mouse is placed in an apparatus with three  
357 communicating chambers. In the left chamber, there is a novel mouse of the same sex  
358 under a wire cup, while in the right chamber there is an empty wire cup. Mice spend  
359 more time exploring and sniffing the stranger mouse than the object and this is  
360 considered a social action (Kaidanovich-Beilin et al., 2011; Nadler et al., 2004). The 1a-  
361 cKO showed no preference for the conspecific both as in the time spent around the  
362 mouse enclosure and the time spent sniffing the stranger mouse (Oaks et al., 2017).  
363 1a/1b-dHET males and females and 1b-KO females behaved like WT mice in this test  
364 (**Fig. 5E-H**). 1b-KO males were moderately affected showing non-significant difference  
365 between the empty cup and the stranger (**Fig.5E**) [Males: WT, time with mouse  
366 ( $t_m$ )= $287.65\pm 26.81s$ , time with object ( $t_o$ )= $162.74\pm 18.15s$ ,  $n=11$ ,  $p=0.00098$  \*\*\*; 1b-KO,  
367  $t_m=282.37\pm 34.83s$ ,  $t_o=187.98\pm 28.63s$ ,  $n=13$ ,  $p=0.082$ ; 1a/1b-dHET,  $t_m=312.05\pm 39.03s$ ,  
368  $t_o=159.39\pm 28.11s$ ,  $n=10$ ,  $p=0.0052$  \*\*. Females: WT,  $t_m=331.50\pm 19.14s$ ,  
369  $t_o=152.70\pm 31.59s$ ,  $n=8$ ,  $p=0.00026$  \*\*\*; 1b-KO,  $t_m=362.93\pm 29.06s$ ,  $t_o=151.53\pm 29.39s$ ,  
370  $n=8$ ,  $p=0.00016$  \*\*\*; 1a/1b-dHET,  $t_m=317.62\pm 20.89s$ ,  $t_o=172.47\pm 12.91s$ ,  $n=9$ ,



Zamarbide et al

371  $p=0.00002$  \*\*\*]. The deficit in 1b-KO males was primarily due to a subset of animals  
372 showing preference for the object (**Suppl. Fig.3**). All genotypes showed significantly  
373 increased time spent sniffing the stranger mouse, indicating that once in the chamber  
374 the 1b-KO animals interact with the other animal (**Fig.5F and H**) [Males: WT, time  
375 sniffing mouse (tsm)= $66.47\pm 7.44$ s, time sniffing object (tso)= $36.61\pm 7.51$ s,  $n=11$ ,  
376  $p=0.0105$  \*; 1b-KO, tsm= $56.04\pm 10.78$ s, tso= $21.47\pm 5.78$ s,  $n=13$ ,  $p=0.009$  \*\*; 1a/1b-  
377 dHET, tsm= $58.40\pm 8.65$ s, tso= $31.11\pm 8.95$ s,  $n=10$ ,  $p=0.042$  \*. Females: WT,  
378 tsm= $60.11\pm 10.60$ s, tso= $31.15\pm 7.71$ s,  $n=8$ ,  $p=0.044$  \*; 1b-KO, tsm= $96.68\pm 13.00$ s,  
379 tso= $29.93\pm 5.55$ s,  $n=8$ ,  $p=0.00033$  \*\*\*; 1a/1b-dHET, tsm= $55.80\pm 5.66$ s, to= $18.26\pm 4.02$ s,  
380  $n=9$ ,  $p=0.00005$  \*\*\*].

381 In conclusion, 1b-KO and 1a/1b-dHET animals show only partially overlapping  
382 behavioral profiles in anxiety, hyperactivity, and sociability. 1b-KO mice of either sex do  
383 not appear anxious or hyperactive and only males show a mild sociability deficit in the  
384 three-chamber test. 1a/1b-dHET males are more similar to 1a-cKO mice with increased  
385 locomotion and decreased time in the center of the open field. These results show that  
386 CC2D1A and CC2D1B only have partially redundant roles in cognitive and social  
387 function. Each of the *Cc2d1* genes contributes to aspects of learning and memory and  
388 sociability, but *Cc2d1a* appears to be more critical for hyperactivity and anxiety.  
389 Interestingly, both lines display sexually dimorphic phenotypes with males being mildly  
390 more affected than females.

391

## 392 Discussion

393 Cognitive development is controlled by a multitude of mechanisms regulating  
394 synaptic transmission and neuronal function. Hundreds of genes have been found

Zamarbide et al

395 mutated in patients with ID and ASD and the generation of mouse models has deepened  
396 our understanding of how each gene contributes to disease and behavior (Ey et al.,  
397 2011; Kazdoba et al., 2015; Nestler and Hyman, 2010). Mutations in the gene encoding  
398 CC2D1A cause a rare form of ID and ASD in humans, and this protein is emerging as a  
399 critical regulator of intracellular signaling with roles in cognitive function (Basel-  
400 Vanagaite et al., 2006; Manzini et al., 2014), immunity (Chang et al., 2011; Zhao et al.,  
401 2010) and cancer (Yamada et al., 2015). Removal of the only *CC2D1* homolog in  
402 *Drosophila*, *lgd*, causes early lethality and severe deficits in morphogenesis, and both  
403 human proteins can rescue *lgd* LOF phenotypes, suggesting that the vertebrate CC2D1  
404 proteins have redundant functions (Drusenheimer et al., 2015). In fact, deficits in *lgd*  
405 mutant flies are more severe than in 1a-KO and 1b-KO mice (Drusenheimer et al.,  
406 2015). We hypothesized that the neuropsychiatric phenotypes observed in humans  
407 carrying *CC2D1A* LOF mutations are likely due to the inability of CC2D1B to fully  
408 substitute for CC2D1A.

409 Initial evidence to support our hypothesis was provided by the fact that 1a-KO  
410 mice are anatomically normal but die soon after birth due to breathing and swallowing  
411 deficits (Al-Tawashi et al., 2012; Chen et al., 2012; Oaks et al., 2017; Zhao et al., 2011),  
412 while 1b-KOs are viable and fertile (Drusenheimer et al., 2015). No respiratory deficits  
413 have been reported in humans with *CC2D1A* mutations and these findings indicated that  
414 *Cc2d1a* has an essential role in breathing regulation in the brain stem in the mouse  
415 where CC2D1B cannot complement CC2D1A function. We do not know whether this  
416 difference between mice and humans is due to the timing of birth which is at an earlier  
417 stage of neural development in mice, or to differences in CC2D1A and CC2D1B  
418 expression in the brain stem in the two species.

Zamarbide et al

419           The current study provides further evidence that *Cc2d1a* LOF is more severe  
420 than *Cc2d1b* LOF through behavioral studies. Forebrain-specific *Cc2d1a*-deficient mice  
421 1a-cKO display an array of cognitive and social deficits, in addition to anxiety and  
422 hyperactivity (Oaks et al., 2017). 1b-KO mice only display cognitive deficits, with object  
423 recognition impairment in the NORT and reduced memory acquisition and retention in  
424 the MWM test, but no other phenotypes. Interestingly, the MWM test results reveal  
425 different roles for the CC2D1 proteins in spatial learning and memory. 1a-cKO animals  
426 showed delayed learning, but no deficit in remembering the location of the platform once  
427 it was learned (Oaks et al., 2017), while 1b-KO mice also displayed reduced memory  
428 retention in the probe especially in males. Parallel studies in the 1a/1b-dHET line confirm  
429 this difference observing deficits in both spatial memory acquisition and retention. In  
430 comparing cognitive performance in 1b-KOs with 1a/1b-dHET and previously published  
431 1a-cKOs, all lines were equally deficient in the NORT, indicating that object recognition  
432 circuits in the cortex and hippocampus are affected (Antunes and Biala, 2012).

433           *Cc2d1b* also differs from *Cc2d1a*, as it appears to have no role in social  
434 behavior, hyperactivity and anxiety. Results from the 1a/1b-dHETs suggest that partial  
435 loss of *Cc2d1a* in combination with a half dosage of *Cc2d1b* is sufficient to generate  
436 hyperactivity and anxiety. Interestingly, only complete loss of *Cc2d1a* leads to social  
437 deficits. Taken together, our results indicate that *Cc2d1a* and *Cc2d1b* have roles in  
438 behavioral function that are only partially redundant. Behavior is regulated by a multitude  
439 of molecular and cellular mechanisms, but it is interesting to note how each of these two  
440 homologous proteins may contribute to specific sets of behaviors. These effects could  
441 be due to their role in controlling a variety of intracellular signaling processes and  
442 thereby affecting multiple cellular functions.

Zamarbide et al

443 CC2D1A and CC2D1B were reported to regulate endocytosis and gene  
444 transcription (Drusenheimer et al., 2015; Hadjighassem et al., 2011; Martinelli et al.,  
445 2012; Usami et al., 2012), but CC2D1A has been the most studied to date. Many of the  
446 pathways regulated by CC2D1A, such as Akt, CREB and NF- $\kappa$ B, are important for  
447 learning and memory (Bourtchuladze et al., 1994; Lai et al., 2006; Majumdar et al., 2011;  
448 Meffert et al., 2003). Initial findings in *Cc2d1a*-deficient cells showed an imbalance in  
449 signaling activation (Al-Tawashi et al., 2012; Manzini et al., 2014) and mild disruptions in  
450 endosome size (Drusenheimer et al., 2015), again demonstrating how CC2D1B is not  
451 fully able to compensate for CC2D1A. Our results in the 1a/1b-dHET also imply that  
452 there is a balance in CC2D1A and CC2D1B activity, and experiments in *Drosophila* and  
453 mammalian cells suggest that *Cc2d1a* and *Igd* expression and subcellular localization  
454 must be finely regulated to control endosomal trafficking and signaling through  
455 recruitment to specific signaling complexes (Drusenheimer et al., 2015; Gallagher and  
456 Knoblich, 2006; Jaekel and Klein, 2006; Manzini et al., 2014). This could be explained by  
457 a critical role for the CC2D1 proteins in the maintenance of signaling homeostasis.  
458 Homeostasis is broadly defined as the ability of a cell to return to a set point and  
459 maintain equilibrium. Many genes mutated in ASD and ID control homeostatic  
460 mechanisms in synaptic transmission, transcription, and signaling (De Rubeis et al.,  
461 2014; Pinto et al., 2014), and genomic deletions and duplications may show similar  
462 neurodevelopmental phenotypes leading to the hypothesis that pathogenesis of  
463 neurodevelopmental disorders is linked to homeostatic imbalance (Ramocki and Zoghbi,  
464 2008). Behavioral impairments in cognitive and social function could then be caused by  
465 subtle disruptions in multiple cellular processes limiting the ability of individual neurons  
466 and/or neuronal circuits to respond to stimuli, including environmental changes or  
467 stressors. In this respect, defining the role of CC2D1A and CC2D1B in homeostatic

Zamarbide et al

468 signaling of multiple pathways disrupted in ASD and ID could be important to dissect  
469 whether different signaling pathways contribute to distinct behavioral deficits.

470 Finally, in light of the cognitive defects in the 1b-KO mice, it may be worthwhile to  
471 search for *CC2D1B* mutations in patients with cognitive deficits, and to also consider the  
472 possibility of trans-heterozygous cases where *CC2D1A* and *CC2D1B* mutations are both  
473 present in heterozygosity. While complete loss of both *CC2D1* genes is embryonic  
474 lethal, haploinsufficiency of both *CC2D1A* and *CC2D1B* may lead to ID and ASD as  
475 *CC2D1A* LOF does. In the Genome Aggregation Database browser, which collects allele  
476 frequency data from more than 100,000 individuals in different populations there are 43  
477 likely gene disrupting (stop codon, frameshift or splice site) alleles for *CC2D1A* and 89  
478 for *CC2D1B*. These variants alone or in combination may further contribute to the  
479 genetic burden of ID.

480

#### 481 **Funding**

482 This work was supported by NIH grant R00HD067379, a Pilot Award from the  
483 Intellectual and Developmental Disabilities Research Center (IDDRC) at Children's  
484 Research Institute (P30HD040677) and institutional start-up funds from the George  
485 Washington University to M.C.M.

486

#### 487 **Acknowledgements**

488 The authors are grateful to Tom Maynard and Irene Zohn for advice on mouse line  
489 generation and the analysis of the double knockouts, Anthony LaMantia, Judy Liu, Maria  
490 Chahrour, Emanuela Santini, and Sally Till for helpful discussion on experimental  
491 design. The *Cc2d1a* and *Cc2d1b* KO mouse strains used for this research project were  
492 generated by the trans-NIH Knock-Out Mouse Project (KOMP) and obtained from the

Zamarbide et al

493 KOMP Repository ([www.komp.org](http://www.komp.org)). NIH grants to Velocigene at Regeneron Inc  
494 (U01HG004085) and the CSD Consortium (U01HG004080) funded the generation of  
495 gene-targeted ES cells for 8500 genes in the KOMP Program and archived and  
496 distributed by the KOMP Repository at UC Davis and CHORI (U42RR024244). For more  
497 information or to obtain KOMP products go to [www.komp.org](http://www.komp.org) or email  
498 [service@komp.org](mailto:service@komp.org).

499

## 500 Tables

501 **Table 1.** Analysis of basic motor and sensory function in 1b-KO and 1a/1b-dHET mice

| Genotype   | Sex | Weight (g)   | Righting reflex (s) | Wire hang (s) | Stride and gait | Tail pinch <sup>a</sup> | Visual reflex <sup>b</sup> |
|------------|-----|--------------|---------------------|---------------|-----------------|-------------------------|----------------------------|
| WT         | M   | 28.39 ± 0.94 | <1 s                | 56.5 ± 2.35   | Normal          | 6/9                     | 9/9                        |
| 1b-KO      | M   | 27.49 ± 0.67 | <1 s                | 52.21 ± 5.05  | Normal          | 7/10                    | 10/10                      |
| 1a/1b-dHET | M   | 28.32 ± 0.85 | <1 s                | 53.61 ± 3.24  | Normal          | 6/8                     | 8/8                        |
| WT         | F   | 21.06 ± 0.53 | <1 s                | 58.7 ± 1.09   | Normal          | 7/10                    | 10/10                      |
| 1b-KO      | F   | 21.95 ± 0.83 | <1 s                | 55.87 ± 3.71  | Normal          | 6/8                     | 8/8                        |
| 1a/1b-dHET | F   | 21.81 ± 0.88 | <1 s                | 58.2 ± 1.59   | Normal          | 7/10                    | 10/10                      |

502

503 <sup>a</sup> Animals responding to tail pinch. <sup>b</sup> Animals responding to visual stimulus.

504

505 **Figures and Legends**

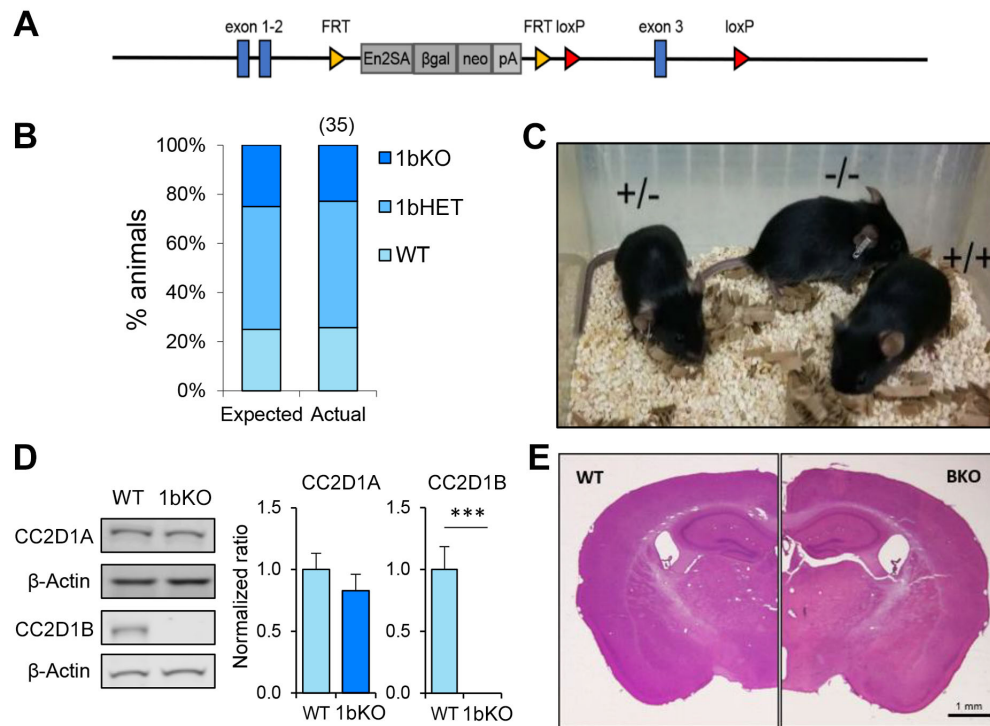

506

507 **Figure 1. *Cc2d1b* KO mice are viable and fertile and present normal anatomical**  
 508 **development of the brain. A.** Gene trap containing engrailed 2 splice acceptor (En2SA)  
 509 sequence followed by a  $\beta$ -Galactosidase cassette ( $\beta$ gal) and a neomycin resistance  
 510 cassette (neo) is flanked by flippase recognition target (FRT) sites between exons 2 and  
 511 3. LoxP sites for Cre recombinase targeting flank exon 3. **B.** 1bKO mice are born in  
 512 predicted Mendelian ratios (number of pups indicated above in parentheses; data from 5  
 513 litters) and **C.** are indistinguishable from WT and 1bHET mice. **D.** Immunoblot analysis of  
 514 CC2D1A and CC2D1B expression in WT and 1bKO mice. Normal levels of CC2D1A and  
 515 a complete absence of CC2D1B are shown in the 1bKO mice. (E) The size and  
 516 organization of the adult 1bKO brain is indistinguishable from WT brain stained with  
 517 hematoxylin and eosin. Scale bar: 1mm.

518

Zamarbide et al

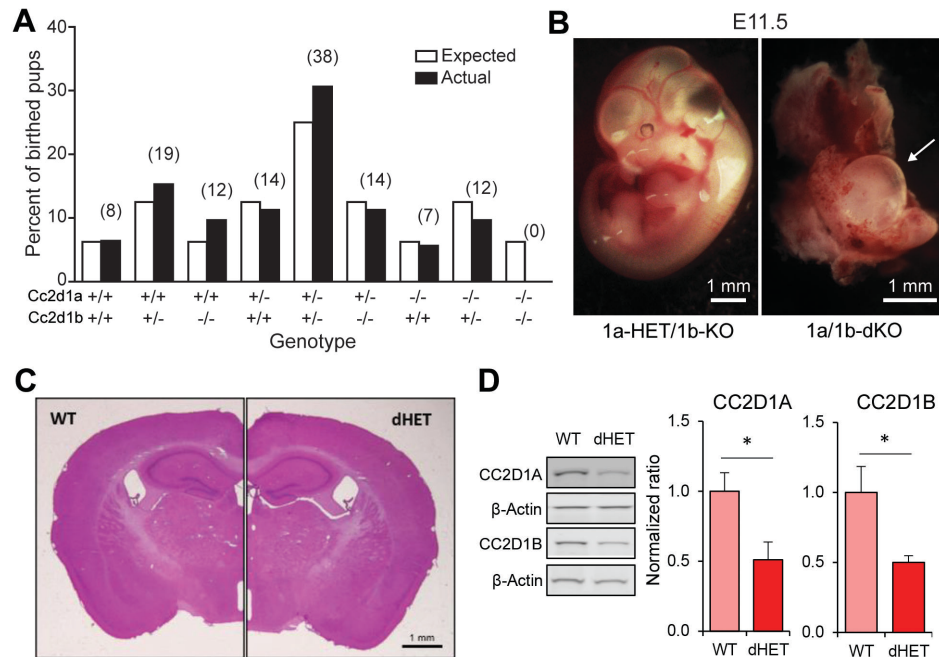

519

520 **Figure 2. *Cc2d1a/Cc2d1b* double LOF is embryonic lethal, while double**

521 **heterozygotes are viable. A.** Genotypes at postnatal day 0 (P0) of 124 pups resulting

522 from 22 double heterozygous (1a/1b-dHET) crosses (number of pups for each genotype

523 indicated above in parentheses). The 1a/1b double knockout (A<sup>-/-</sup> B<sup>-/-</sup>) pups were never

524 found at P0. **B.** Representative images of normal embryonic day 11.5 (E11.5) embryo

525 with a single intact *Cc2d1* allele (left panel) and a double KO embryo (right panel; arrow

526 indicates empty yolk sac). Scale bars: 1mm **C.** The size and organization of the adult

527 1a/1b-dHET brain is indistinguishable from wild type mice stained with hematoxylin and

528 eosin. Scale bar: 1mm **D.** Immunoblot analysis of CC2D1A and CC2D1B expression in

529 wild-type and 1a/1b-dHET mice. A half dose of each CC2D1 protein was found. Results

530 expressed as mean ± SEM. \*p<0.05 (two tailed t-test).

531

532

533



Zamarbide et al

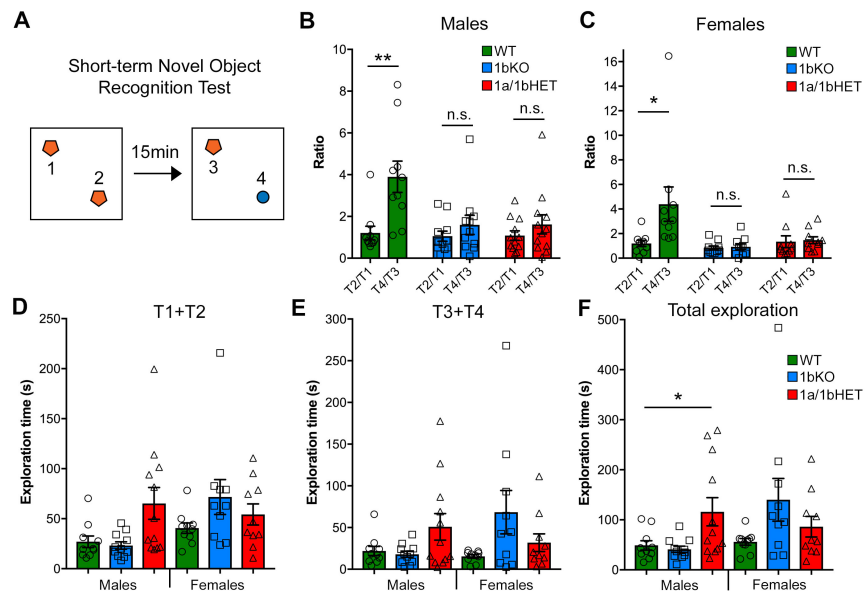

534

535 **Figure 3. CC2D1A and CC2D1B are both involved in object memory. A.** Schematic  
 536 design of short-term novel object recognition test (NORT), with a novel object replacing  
 537 a familiar object after a 15 min interval. **B-C.** In contrast to WT, 1bKO and 1a/1bHET  
 538 male (**B.**) and female (**C.**) mice showed no preference for the novel object relative to a  
 539 familiar object. Results expressed as mean  $\pm$  SEM, \*\* $p < 0.01$  (two-tailed t-test with equal  
 540 variance). **D-F.** Exploration time divided by initial exploration of training objects 1 and 2  
 541 (**D.**), test objects 3 and 4 (**E.**) and total exploration across the two phases of the NORT  
 542 (**F.**). 1a-1bHET males show a trend towards increased exploration in each test phase  
 543 which reaches significance when both phases are combined. Results expressed as  
 544 mean  $\pm$  SEM, One-way ANOVA with Dunnett's multiple comparison test, \* $p < 0.05$ ,  
 545 \*\* $p < 0.01$

546

547

548

549

Zamarbide et al

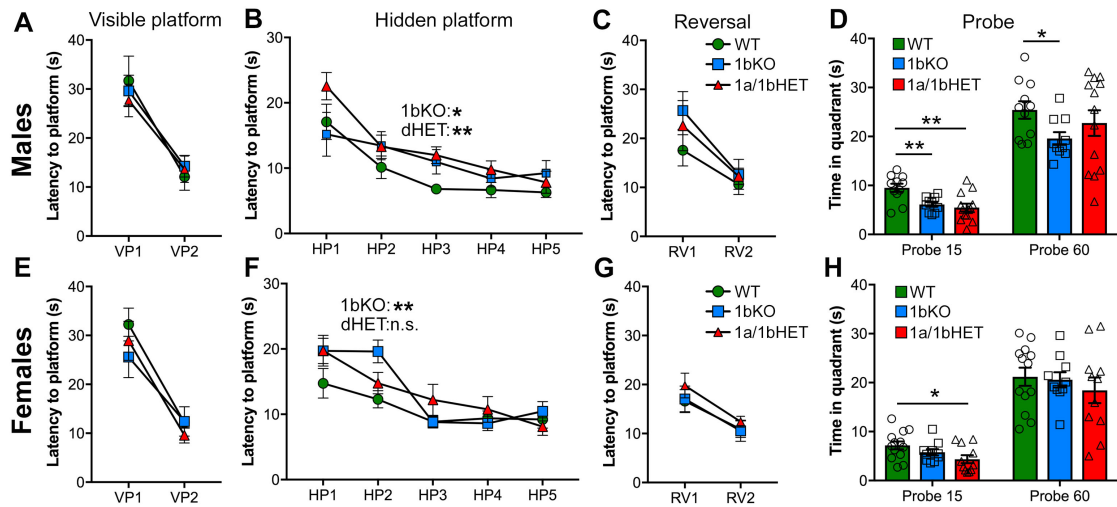

550

551 **Figure 4. CC2D1B is involved in spatial memory formation and retention with mild**  
 552 **male-specificity.** Hippocampus-dependent spatial memory was assessed in 1bKO and  
 553 1a/1bdHET mice via the Morris Water Maze test. Spatial learning was measured as  
 554 latency to escape in three different stages, visible platform (VP), hidden platform (HP), or  
 555 the reversal (RV) of the hidden platform position. No deficits were shown by males (**A.**)  
 556 or females (**E.**) of any genotype in identifying the platform in the VP trial. **B.** Both 1bKO  
 557 and 1a/1bHET males showed a delay in learning the location of the hidden platform, and  
 558 a similar deficit was present in 1bKO females (**F.**). **C.** and **G.** No differences were found  
 559 in the RV during the test. **D.** and **H.** Spatial memory retention was measured between  
 560 the HP and RV trials by the time spent swimming in the quadrant where the platform was  
 561 previously located. Significant spatial memory impairment was found in the 1bKO male  
 562 mice compared to WT both during the first 15sec and at the end of the trial after 60sec,  
 563 while female 1bKO mice showed no deficit. 1a/1bHET males and females spent less  
 564 time looking for the platform during the first 15sec, but subsequently recovered. Two-  
 565 way ANOVA with repeated measures was used for analysis of the HP phase. Multiple t-  
 566 tests with equal variance were uses for individual timepoints and probe analysis \*p<0.05,  
 567 \*\*p<0.01

Zamarbide et al

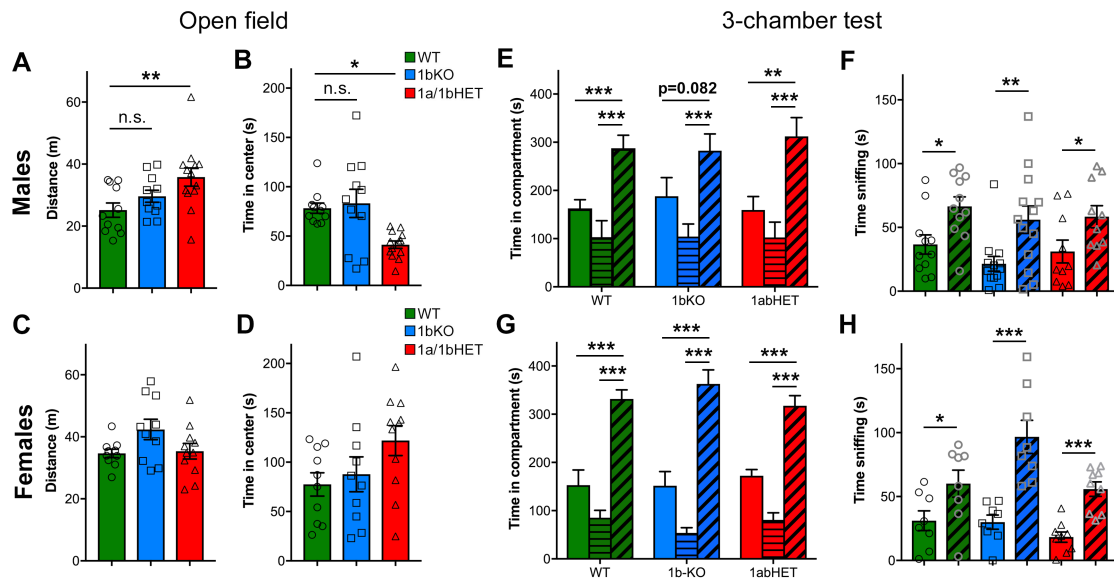

568

569 **Figure 5. CC2D1A contributes to anxiety and hyperactivity. A-D.** Exploratory and  
 570 general locomotor activity in a novel environment was assessed on the open field test.  
 571 Total path length (**A.**) and time spent in the center zone (**B.**) are only affected in  
 572 1a/1bHET male mice, while females show no difference (**C-D.**). Results expressed as  
 573 mean  $\pm$  SEM, One-way ANOVA with Dunnett's multiple comparison test, \* $p < 0.05$ ,  
 574 \*\* $p < 0.01$  **E-H.** Social interaction behavior was assessed by the three-chamber test,  
 575 presented as time spent in each chamber (**E.,G.**) and time spent sniffing the novel  
 576 mouse vs. the empty cup (**F.,H.**). 1bKO male mice showed significantly increased  
 577 sniffing of the novel mouse vs. the cup (**F.**), but did not show a significant increase in  
 578 time in the compartment indicating that they may display less interest for the mouse (**E.**).  
 579 1a/1bHET males and females and 1bKO females showed no difference from WT  
 580 littermates (**E-H.**). Results expressed as mean  $\pm$  SEM. Two-tailed t-test with equal  
 581 variance \* $p < 0.05$ , \*\* $p < 0.01$ , \*\*\* $p < 0.001$

582

583

584

Zamarbide et al

## 585 **References**

- 586 Al-Tawashi, A., Jung, S.Y., Liu, D., Su, B., and Qin, J. (2012). Protein implicated in  
587 nonsyndromic mental retardation regulates protein kinase A (PKA) activity. *Journal of*  
588 *Biological Chemistry* *287*, 14644–14658.
- 589 Antunes, M., and Biala, G. (2012). The novel object recognition memory: neurobiology,  
590 test procedure, and its modifications. *Cogn Process* *13*, 93–110.
- 591 Basel-Vanagaite, L., Attia, R., Yahav, M., Ferland, R.J., Anteki, L., Walsh, C.A., Olender,  
592 T., Straussberg, R., Magal, N., Taub, E., et al. (2006). The CC2D1A, a member of a new  
593 gene family with C2 domains, is involved in autosomal recessive non-syndromic mental  
594 retardation. *J Med Genet* *43*, 203–210.
- 595 Bevins, R.A., and Besheer, J. (2006). Object recognition in rats and mice: a one-trial  
596 non-matching-to-sample learning task to study 'recognition memory'. *Nat Protoc* *1*,  
597 1306–1311.
- 598 Bourtchuladze, R., Frenguelli, B., Blendy, J., Cioffi, D., Schütz, G., and Silva, A.J.  
599 (1994). Deficient long-term memory in mice with a targeted mutation of the cAMP-  
600 responsive element-binding protein. *Cell* *79*, 59–68.
- 601 Chang, C.-H., Lai, L.-C., Cheng, H.-C., Chen, K.-R., Syue, Y.-Z., Lu, H.-C., Lin, W.-Y.,  
602 Chen, S.-H., Huang, H.-S., Shiau, A.-L., et al. (2011). TBK1-associated protein in  
603 endolysosomes (TAPE) is an innate immune regulator modulating the TLR3 and TLR4  
604 signaling pathways. *Journal of Biological Chemistry* *286*, 7043–7051.
- 605 Chen, K.-R., Chang, C.-H., Huang, C.-Y., Lin, C.-Y., Lin, W.-Y., Lo, Y.-C., Yang, C.-Y.,  
606 Hsing, E.-W., Chen, L.-F., Shih, S.-R., et al. (2012). TBK1-associated protein in  
607 endolysosomes (TAPE)/CC2D1A is a key regulator linking RIG-I-like receptors to  
608 antiviral immunity. *Journal of Biological Chemistry* *287*, 32216–32221.
- 609 De Rubeis, S., He, X., Goldberg, A.P., Poultney, C.S., Samocha, K., Ercument Cicek, A.,  
610 Kou, Y., Liu, L., Fromer, M., Walker, S., et al. (2014). Synaptic, transcriptional and  
611 chromatin genes disrupted in autism. *Nature* –.
- 612 Drusenheimer, N., Migdal, B., Jäckel, S., Tveriakhina, L., Scheider, K., Schulz, K.,  
613 Gröper, J., Köhrer, K., and Klein, T. (2015). The Mammalian Orthologs of *Drosophila*  
614 *Lgd*, CC2D1A and CC2D1B, Function in the Endocytic Pathway, but Their Individual  
615 Loss of Function Does Not Affect Notch Signalling. *PLoS Genet* *11*, e1005749.
- 616 Ey, E., Leblond, C.S., and Bourgeron, T. (2011). Behavioral profiles of mouse models for  
617 autism spectrum disorders. *Autism Res* *4*, 5–16.
- 618 Gallagher, C.M., and Knoblich, J.A. (2006). The conserved c2 domain protein lethal (2)  
619 giant discs regulates protein trafficking in *Drosophila*. *Developmental Cell* *11*, 641–653.
- 620 Hadjighassem, M.R., Austin, M.C., Szewczyk, B., Daigle, M., Stockmeier, C.A., and  
621 Albert, P.R. (2009). Human Freud-2/CC2D1B: a novel repressor of postsynaptic  
622 serotonin-1A receptor expression. *Biol. Psychiatry* *66*, 214–222.

Zamarbide et al

- 623 Hadjighassem, M.R., Galaraga, K., and Albert, P.R. (2011). Freud-2/CC2D1B mediates  
624 dual repression of the serotonin-1A receptor gene. *Eur J Neurosci* *33*, 214–223.
- 625 Jaekel, R., and Klein, T. (2006). The Drosophila Notch inhibitor and tumor suppressor  
626 gene lethal (2) giant discs encodes a conserved regulator of endosomal trafficking.  
627 *Developmental Cell* *11*, 655–669.
- 628 Kaidanovich-Beilin, O., Lipina, T., Vukobradovic, I., Roder, J., and Woodgett, J.R.  
629 (2011). Assessment of social interaction behaviors. *J Vis Exp* e2473–e2473.
- 630 Kazdoba, T.M., Leach, P.T., and Crawley, J.N. (2015). Behavioral phenotypes of genetic  
631 mouse models of autism. *Genes Brain Behav* n/a–n/a.
- 632 Lai, W.-S., Xu, B., Westphal, K.G.C., Paterlini, M., Olivier, B., Pavlidis, P., Karayiorgou,  
633 M., and Gogos, J.A. (2006). Akt1 deficiency affects neuronal morphology and  
634 predisposes to abnormalities in prefrontal cortex functioning. *Proc Natl Acad Sci USA*  
635 *103*, 16906–16911.
- 636 Lim, E.T., Raychaudhuri, S., Sanders, S.J., Stevens, C., Sabo, A., Macarthur, D.G.,  
637 Neale, B.M., Kirby, A., Ruderfer, D.M., Fromer, M., et al. (2013). Rare complete  
638 knockouts in humans: population distribution and significant role in autism spectrum  
639 disorders. *Neuron* *77*, 235–242.
- 640 Majumdar, D., Nebhan, C.A., Hu, L., Anderson, B., and Webb, D.J. (2011). An  
641 APPL1/Akt signaling complex regulates dendritic spine and synapse formation in  
642 hippocampal neurons. *Mol Cell Neurosci* *46*, 633–644.
- 643 Manzini, M.C., Xiong, L., Shaheen, R., Tambunan, D.E., Di Costanzo, S., Mitisalis, V.,  
644 Tischfield, D.J., Cinquino, A., Ghaziuddin, M., Christian, M., et al. (2014). CC2D1A  
645 Regulates Human Intellectual and Social Function as well as NF- $\kappa$ B Signaling  
646 Homeostasis. *Cell Rep* *8*, 647–655.
- 647 Martinelli, N., Hartlieb, B., Usami, Y., Sabin, C., Dordor, A., Miguet, N., Avilov, S.V.,  
648 Ribeiro, E.A., Jr, Göttlinger, H., and Weissenhorn, W. (2012). CC2D1A Is a Regulator of  
649 ESCRT-III CHMP4B. *J Mol Biol* *419*, 75–88.
- 650 Meffert, M.K., Chang, J.M., Wiltgen, B.J., Fanselow, M.S., and Baltimore, D. (2003). NF-  
651 kappa B functions in synaptic signaling and behavior. *Nat Neurosci* *6*, 1072–1078.
- 652 Morris, R. (1984). Developments of a water-maze procedure for studying spatial learning  
653 in the rat. *J. Neurosci. Methods* *11*, 47–60.
- 654 Musante, L., and Ropers, H.H. (2014). Genetics of recessive cognitive disorders. *Trends*  
655 *Genet* *30*, 32–39.
- 656 Nadler, J.J., Moy, S.S., Dold, G., Trang, D., Simmons, N., Perez, A., Young, N.B.,  
657 Barbaro, R.P., Piven, J., Magnuson, T.R., et al. (2004). Automated apparatus for  
658 quantitation of social approach behaviors in mice. *Genes Brain Behav* *3*, 303–314.
- 659 Nestler, E.J., and Hyman, S.E. (2010). Animal models of neuropsychiatric disorders. *Nat*

Zamarbide et al

- 660 Neurosci 13, 1161–1169.
- 661 Oaks, A.W., Zamarbide, M., Tambunan, D.E., Santini, E., Di Costanzo, S., Pond, H.L.,  
662 Johnson, M.W., Lin, J., Gonzalez, D.M., Boehler, J.F., et al. (2017). Cc2d1a Loss of  
663 Function Disrupts Functional and Morphological Development in Forebrain Neurons  
664 Leading to Cognitive and Social Deficits. *Cereb Cortex* 27, 1670–1685.
- 665 Pinto, D., Delaby, E., Merico, D., Barbosa, M., Merikangas, A., Klei, L.,  
666 Thiruvahindrapuram, B., Xu, X., Ziman, R., Wang, Z., et al. (2014). Convergence of  
667 genes and cellular pathways dysregulated in autism spectrum disorders. *Am J Hum*  
668 *Genet* 94, 677–694.
- 669 Ramocki, M.B.M., and Zoghbi, H.Y.H. (2008). Failure of neuronal homeostasis results in  
670 common neuropsychiatric phenotypes. *Nature* 455, 912–918.
- 671 Reuter, M.S., Tawamie, H., Buchert, R., Hosny Gebril, O., Froukh, T., Thiel, C., Uebe,  
672 S., Ekici, A.B., Krumbiegel, M., Zweier, C., et al. (2017). Diagnostic Yield and Novel  
673 Candidate Genes by Exome Sequencing in 152 Consanguineous Families With  
674 Neurodevelopmental Disorders. *JAMA Psychiatry* 74, 293–299.
- 675 Rogers, D.C., Fisher, E.M., Brown, S.D., Peters, J., Hunter, A.J., and Martin, J.E. (1997).  
676 Behavioral and functional analysis of mouse phenotype: SHIRPA, a proposed protocol  
677 for comprehensive phenotype assessment. *Mamm Genome* 8, 711–713.
- 678 Sanders, S.J., Murtha, M.T., Gupta, A.R., Murdoch, J.D., Raubeson, M.J., Willsey, A.J.,  
679 Ercan-Sencicek, A.G., DiLullo, N.M., Parikshak, N.N., Stein, J.L., et al. (2012). De novo  
680 mutations revealed by whole-exome sequencing are strongly associated with autism.  
681 *Nature* 485, 237–241.
- 682 Usami, Y., Popov, S., Weiss, E.R., Vriesema-Magnuson, C., Calistri, A., and Göttlinger,  
683 H.G. (2012). Regulation of CHMP4/ESCRT-III function in human immunodeficiency virus  
684 type 1 budding by CC2D1A. *J Virol* 86, 3746–3756.
- 685 Vorhees, C.V., and Williams, M.T. (2006). Morris water maze: procedures for assessing  
686 spatial and related forms of learning and memory. *Nat Protoc* 1, 848–858.
- 687 Yamada, T., Amann, J.M., Fukuda, K., Takeuchi, S., Fujita, N., Uehara, H., Iwakiri, S.,  
688 Itoi, K., Shilo, K., Yano, S., et al. (2015). Akt kinase-interacting protein Aki1 signals  
689 through CREB to drive diffuse malignant mesothelioma. *Cancer Res.* canres.0858.2015.
- 690 Yu, T.W., Chahrour, M.H., Coulter, M.E., Jiralerspong, S., Okamura-Ikeda, K., Ataman,  
691 B., Schmitz-Abe, K., Harmin, D.A., Adli, M., Malik, A.N., et al. (2013). Using whole-  
692 exome sequencing to identify inherited causes of autism. *Neuron* 77, 259–273.
- 693 Zhao, M., Li, X.-D., and Chen, Z. (2010). CC2D1A, a DM14 and C2 domain protein,  
694 activates NF- $\kappa$ B through the canonical pathway. *Journal of Biological Chemistry*  
695 285, 24372–24380.
- 696 Zhao, M., Raino, J., Chen, Z.J., and Kavalali, E.T. (2011). Cc2d1a, a C2 domain  
697 containing protein linked to nonsyndromic mental retardation, controls functional

Zamarbide et al

698 maturation of central synapses. *Journal of Neurophysiology* 105, 1506–1515.

699
